# Supplementary material for: Characterization of Bifidobacterium asteroides Isolates
Source: MDPI journal article supplement (doi:10.3390/microorganisms10030655), 2022-03-18
Supplement: s1 [file s1]

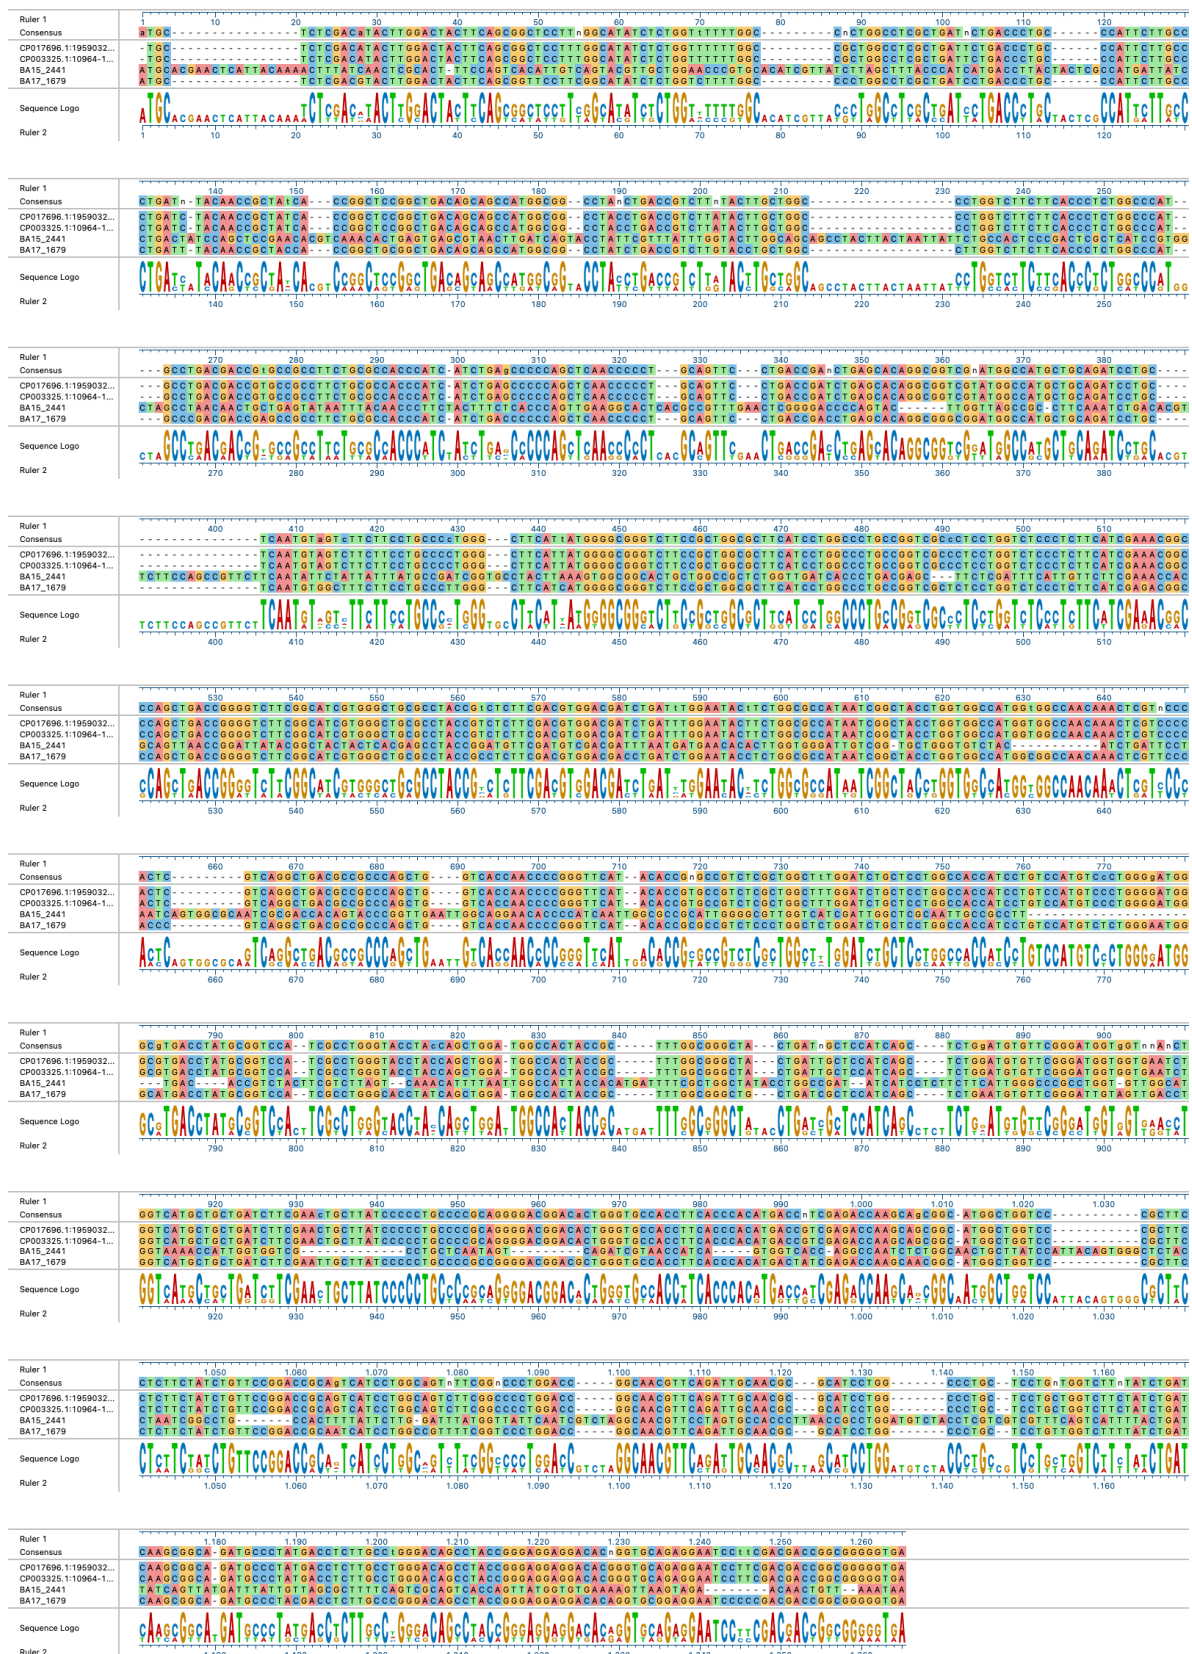

**Figure S1.** Nucleotide sequences of the putative *vanZ* gene of BA15 and BA17 strains and their distance with the DSM 20089 and PRL2011 strains aligned using MUSCLE.
